# Supplementary material for: Human constitutive androstane receptor represses liver cancer development and hepatoma cell proliferation by inhibiting erythropoietin signaling
Source: PubMed Central journal article supplement — J Biol Chem. 2022 Mar 30;298(5):101885. doi: 10.1016/j.jbc.2022.101885 (PMC9052153; doi:10.1016/j.jbc.2022.101885), 2022-03-30

## **Supporting Information**

### **Human constitutive androstane receptor represses liver cancer development and hepatoma cell proliferation by inhibiting erythropoietin signaling**

Zhihui Li<sup>1</sup>, So Mee Kwon<sup>2</sup>, Daochuan Li<sup>1</sup>, Linhao Li<sup>1</sup>, Xiwei Peng<sup>1</sup>, Junran Zhang<sup>3</sup>, Tatsuya Sueyoshi<sup>4</sup>, Jean-Pierre Raufman<sup>5,6</sup>, Masahiko Negishi<sup>4</sup>, Xin Wei Wang<sup>2</sup>, and Hongbing Wang<sup>1</sup>

1. Department of Pharmaceutical Sciences, University of Maryland School of Pharmacy, 20 Penn Street, Baltimore, MD 21201, USA; 2. Laboratory of Human Carcinogenesis, Center for Cancer Research, National Cancer Institute, National Institutes of Health, Bethesda, MD 20892, USA; 3. Department of Radiation Oncology, The Ohio State University James Comprehensive Cancer Center and College of Medicine, OH 43210, USA; 4. Pharmacogenetics Section, Reproductive and Developmental Biology Laboratory, National Institute of Environmental Health Sciences, National Institutes of Health, Research Triangle Park, NC 27709, USA; 5. Division of Gastroenterology and Hepatology, University of Maryland School of Medicine, 22 South Greene Street, Baltimore, MD 21201, USA; 6. VA Maryland Healthcare System, Baltimore, MD 20201, USA.

#### **The file includes:**

- Figures S1-S8
- Tables S1-S2
- Supplementary Methods
- Unedited gels for Western blotting



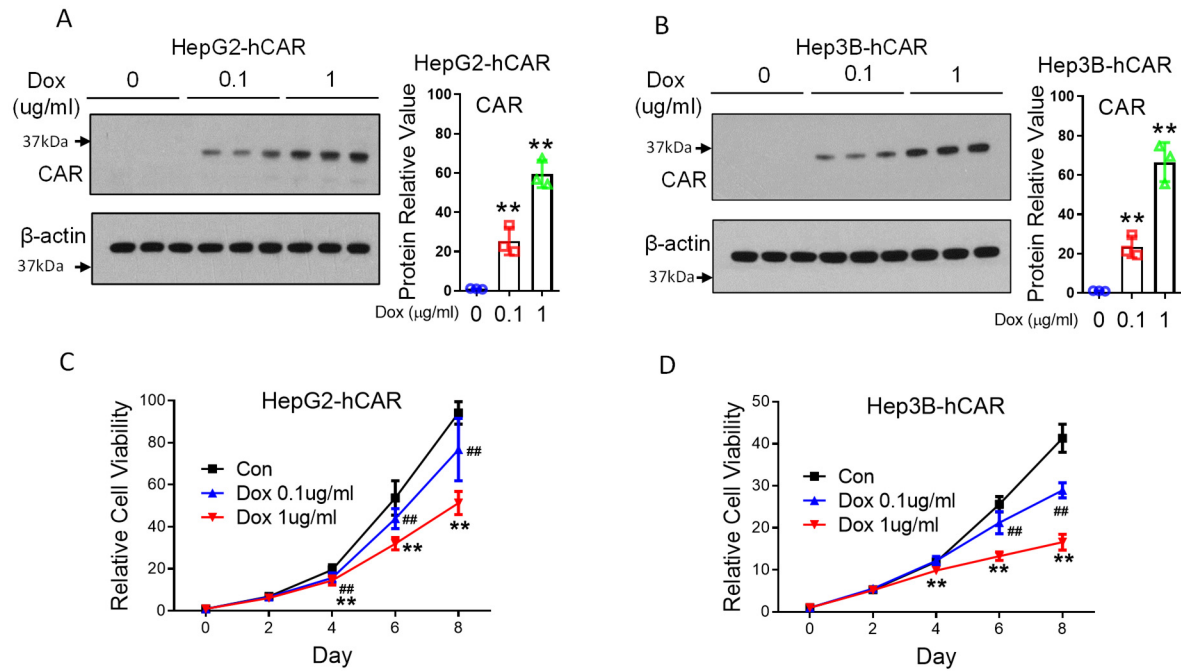

**Figure S2. The levels of hCAR overexpression correlate with the suppressed growth of hepatoma cells *in vitro*.** (A, B) The protein levels of hCAR in HepG2-hCAR and Hep3B-hCAR cells after Dox treatment at 0.1 µg/ml and 1 µg/ml for 72 h. (C, D) The relative growth rates of HepG2-hCAR and Hep3B-hCAR cells under the treatment with vehicle control or Dox at 0.1 µg/ml and 1 µg/ml were measured on day 2, 4, 6, and 8 using CCK8 reagents. Results are expressed as mean ± S.D. from at least three independent experiments in (C) and (D). \*\* and ##,  $p < 0.01$ .

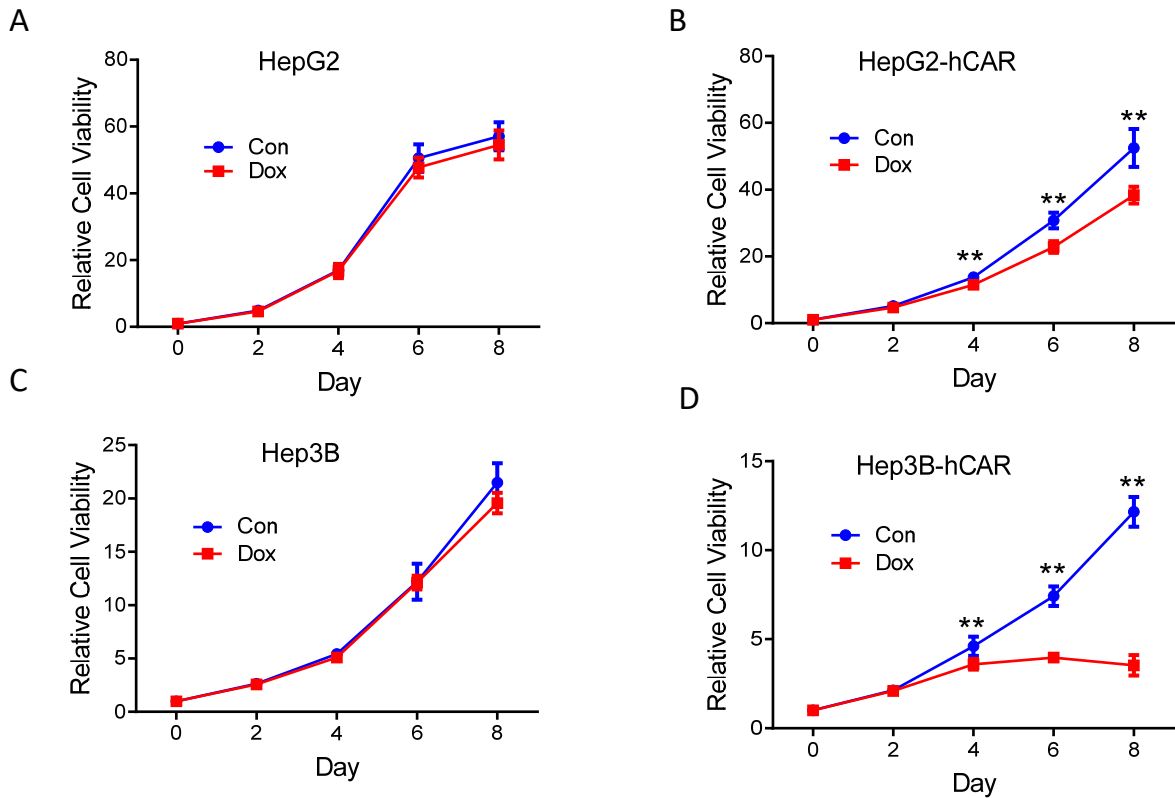

**Figure S3. Cell-Titer-Glo assay confirmed overexpression of CAR suppresses the growth of hepatoma cells.** Cultured HepG2, HepG2-hCAR (A, B) and Hep3B, Hep3B-hCAR (C, D) cells were treated with vehicle control or Dox (1  $\mu\text{g/ml}$ ) for 2, 4, 6, and 8 days as detailed in *Supplementary Materials and Methods*. Relative cell growth rate was measured using the CellTiter-Glo assay following the manufacturer's instructions. Data were collected from at least three independent experiments and expressed as mean  $\pm$  S.D. \*\*,  $p < 0.01$ .

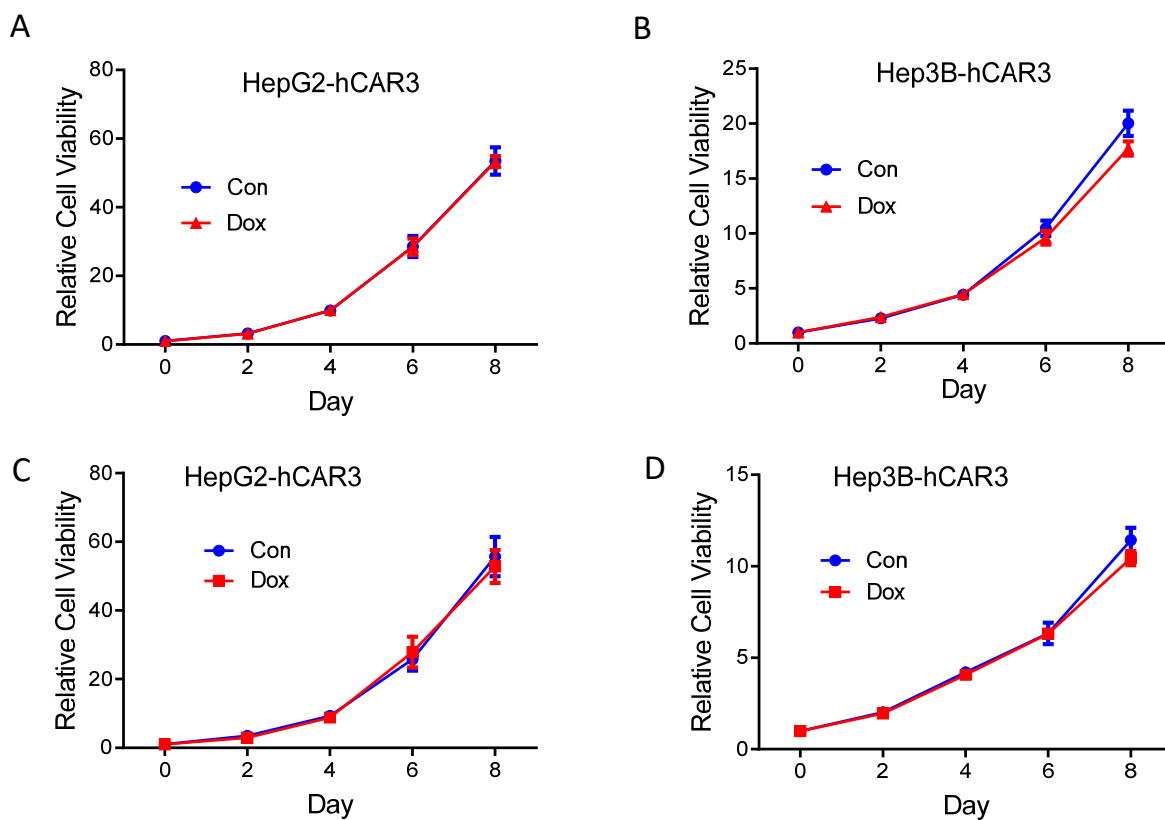

**Figure S4. Overexpression of hCAR3 in HepG2 and Hep3B cells does not alter cell growth rates.** The relative growth rate of HepG2-hCAR3 and Hep3B-hCAR3 cells was measured on day 0, 2, 4, 6, and 8 after vehicle control or Dox (1  $\mu\text{g}/\text{ml}$ ) treatment. Relative cell growth rate was analyzed using the CCK8 assays (A, B) and CellTiter-Glo assays (C, D). Results are expressed as mean  $\pm$  S.D. from at least three independent experiments.

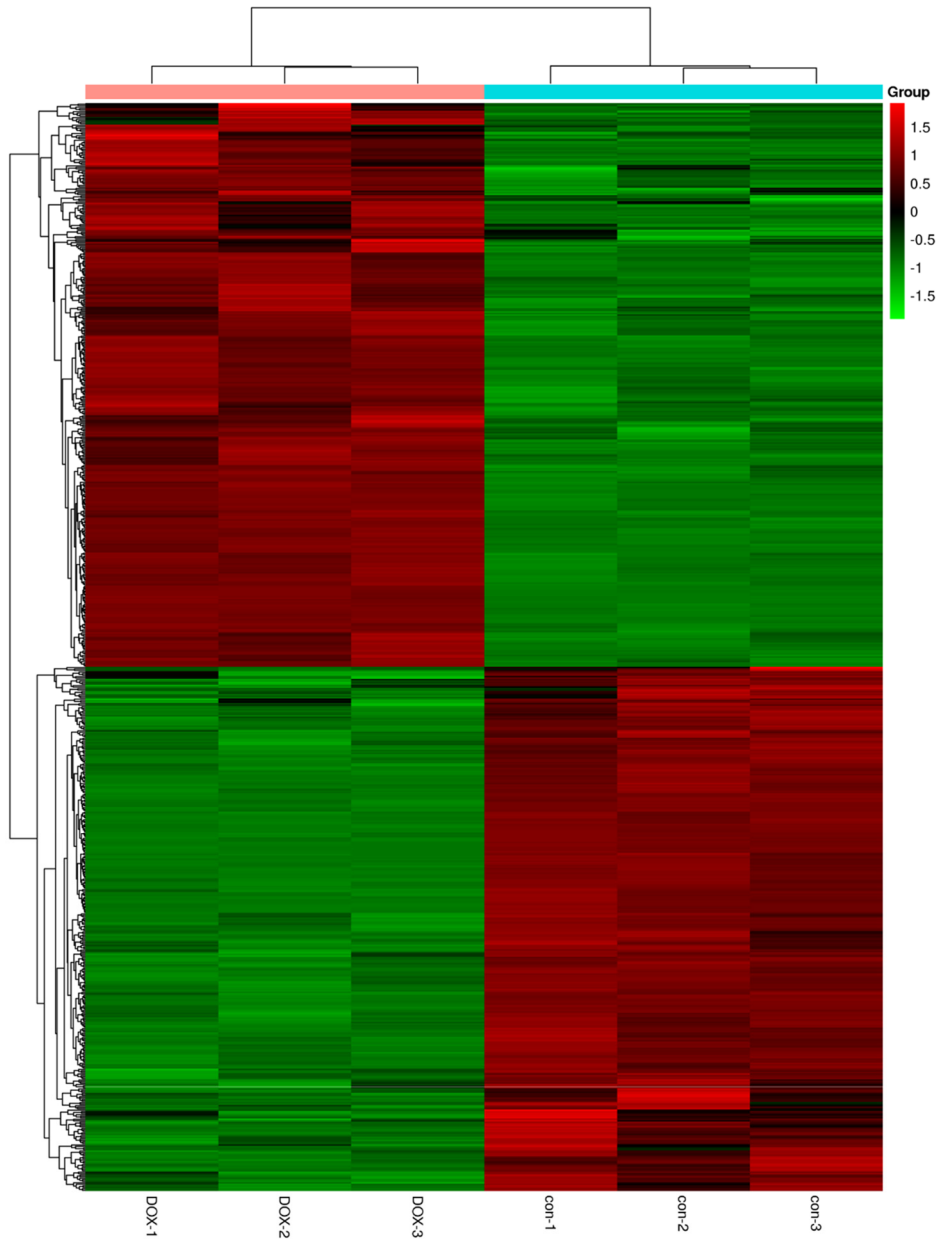

**Figure S5. The hierarchical clustering heatmap of RNA-seq data in HepG2-hCAR cells after hCAR induction.** The Hierarchical Clustering was performed using significant expressed genes (Group-DOX vs Group-con). The group-DOX (DOX-1, DOX-2 and DOX-3) were HepG2-hCAR cells treated with Dox; and the group-con (con-1, con-2 and con-3) were HepG2-hCAR cells treated with vehicle control.

### A Up-regulated enriched pathways in Dox/Con

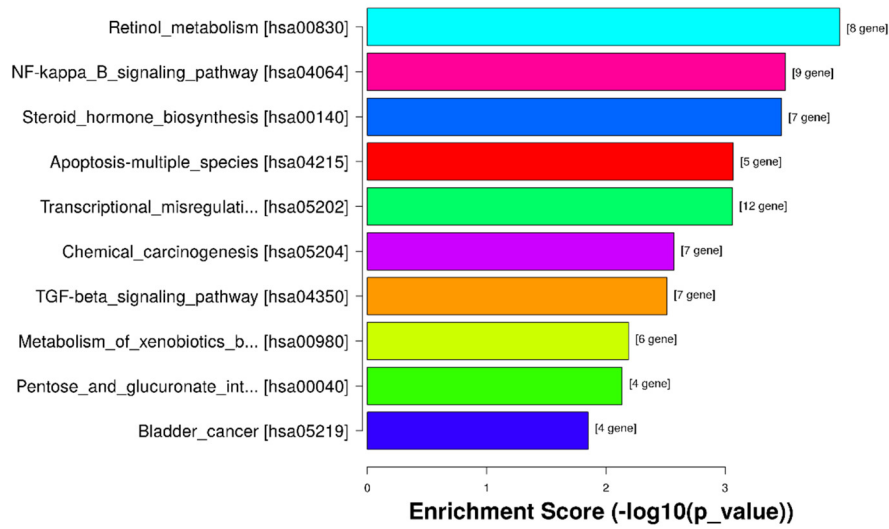

### B Down-regulated enriched pathways in Dox/Con

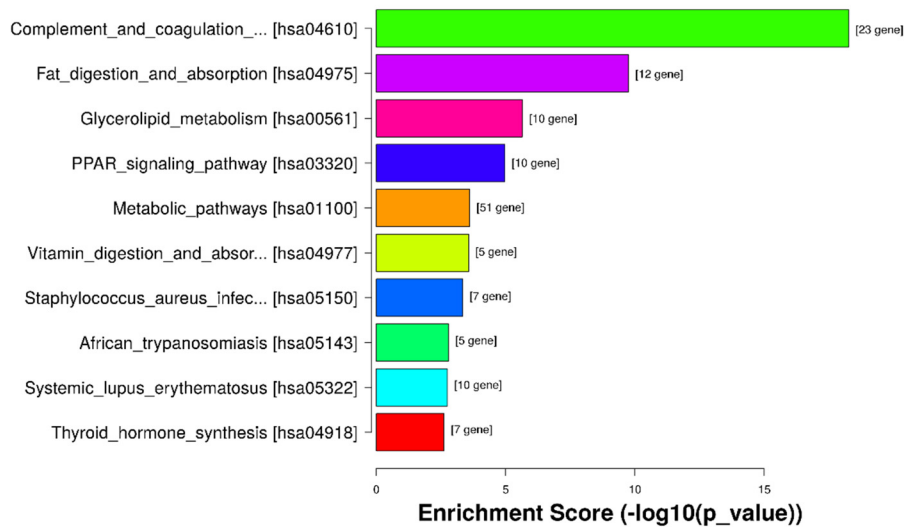

**Figure S6. The significantly enriched pathways of RNA-seq data in HepG2-hCAR cells treated with Dox or vehicle control.** Ordered from top to bottom by p-value, with the most significant pathway on the top. (A) The significant up-regulated pathways in HepG2-hCAR cells treated with Dox. (B) The significant down-regulated pathways in HepG2-hCAR cells treated with Dox.

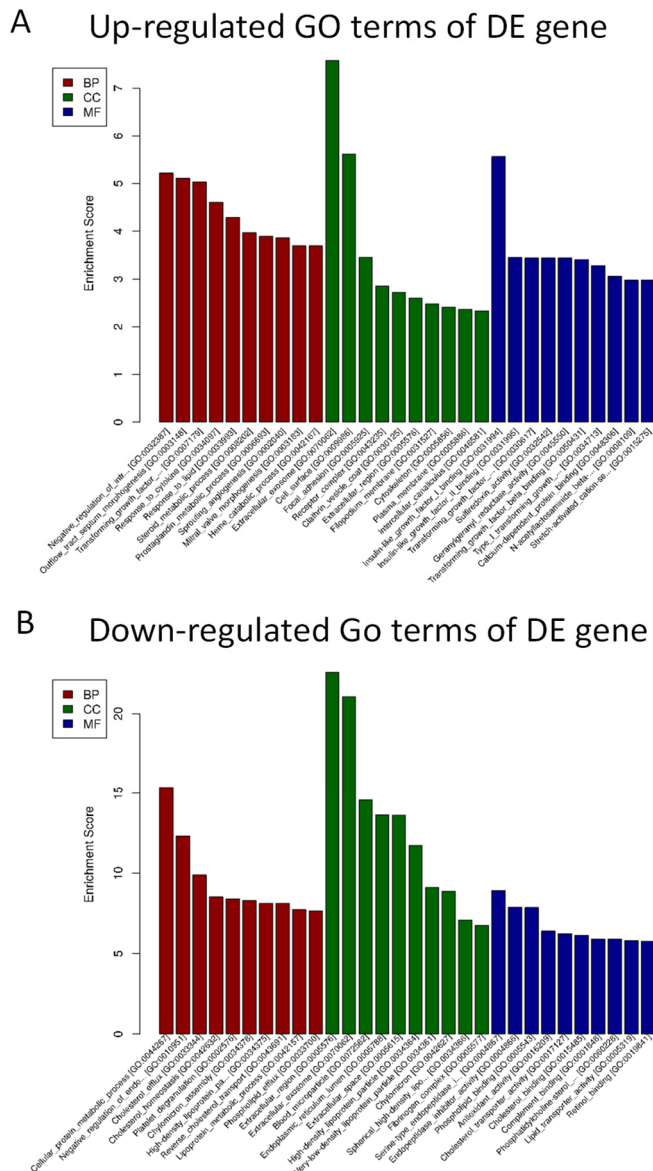

**Figure S7. Gene ontology (GO) analysis of RNA-seq data in HepG2-hCAR cells treated with Dox or vehicle control.** We conducted GO annotation and enrichment analyses to identify the biological process (BP), molecular function (MF), and cellular component (CC) of differentially expressed (DE) genes in RNA-seq data of HepG2-hCAR cells treated with Dox or vehicle control. (A) The up-regulated GO terms of DE gene in HepG2-hCAR cells treated with Dox. (B) The down-regulated GO terms of DE gene in HepG2-hCAR cells treated with Dox.



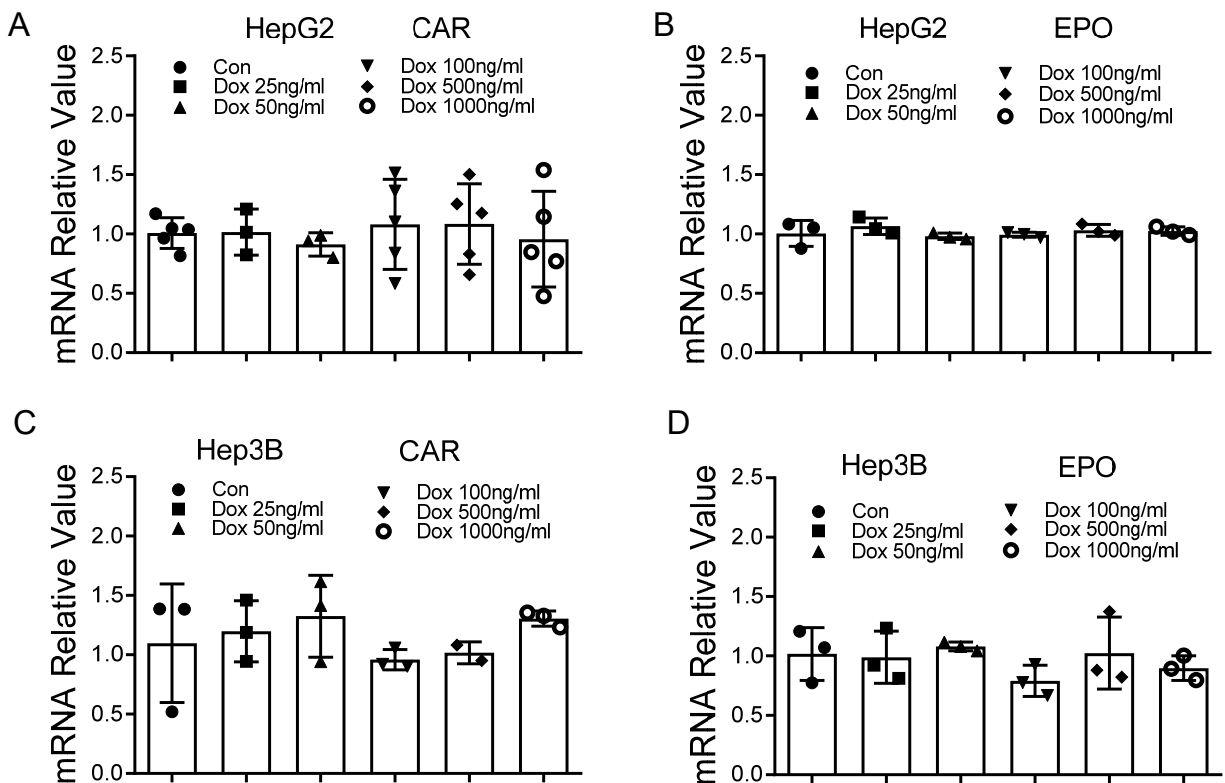

**Figure S8. The expression of hCAR and EPO was not significantly affected by Dox treatment in normal HepG2 and Hep3B cells.** (A, B) mRNA expression of hCAR and EPO was analyzed in normal HepG2 cells after treatment with vehicle control or Dox at indicated concentrations for 72 h. (C, D) mRNA expression of hCAR and EPO was analyzed in normal Hep3B cells after treatment with vehicle control or Dox at indicated concentration for 72 h. Data were collected from at least three independent experiments and expressed as mean  $\pm$  S.D.

**Table S1. List of PCR Primer sequences**

| <b>Primer sequences for RT-PCR</b>                                   |                                      |                                      |
|----------------------------------------------------------------------|--------------------------------------|--------------------------------------|
| <b>Gene name</b>                                                     | <b>Forward primer sequence 5'-3'</b> | <b>Reverse primer sequence 5'-3'</b> |
| CAR                                                                  | GAGCTGAGGAACTGTGTGGTA                | CTTTTGCTGACTGTTCTCCTGAA              |
| EPO                                                                  | AGGCCCTGTTGGTCAACTCT                 | GCAGTGATTGTTCCGGAGTGGA               |
| HNF4 $\alpha$                                                        | TGAGAATGTGCAGGTGTTGAC                | CGGCTAAATCTGCAGGAGTA                 |
| p21                                                                  | CTGGAGACTCTCAGGGTCGAAA               | GATTAGGGCTTCCTCTTGAGAA               |
| GATA-2                                                               | CATCAAGCCCAAGCGAAGACT                | CAGCTCCTCGAAGCACTCCG                 |
| CYP24A1                                                              | CAAACCGTGGAAAGGCTATC                 | AGTCTTCCCCTTCCAGGATCA                |
| TNS4                                                                 | TTCTCATCGAGTCTTCCGCCAAA              | CCATGATGGAATGCTGGCACACAA             |
| ISM1                                                                 | CTTCCCCAGACCGCGATTC                  | CGACCACCTCTATGGTGACCT                |
| LOXL4                                                                | GTCTAATGGCTGGGGAGTCA                 | GTCAGTGGGCTATGCTGCTT                 |
| ANGPTL1                                                              | AGGAAACTGCGCCACTTTCATAAA             | ATTCCATCTTGGTGCTTGCTTCTGT            |
| CXCL8                                                                | AGGGTTGCCAGATGCAATAC                 | AAACCAAGGCACAGTGGAAC                 |
| CDH1                                                                 | CCGCCGGCGTCTGTAGGAA                  | AGGGCTCTTTGACCACCGCTCTC              |
| CD3D                                                                 | ACTGGCTACCCTTCTCTCG                  | CCGTTCCCTCTACCCATGTGA                |
| FABP1                                                                | GCTGGGTCCAAAGTGATCCA                 | TGTCACCTTCCAAGTGAACCA                |
| APOC3                                                                | GTTACATGAAGCACGCCACC                 | CACGGCTGAAGTTGGTCTGA                 |
| AHSG                                                                 | TCCTTGGGGATACAAACACACC               | TACCACGGAAAAGTGGCCATC                |
| AFP                                                                  | AAATACATCCAGGAGAGCCA                 | CTGAGCTTGGCACAGATCCT                 |
| MTPP                                                                 | GGTCAATGGAGTTTAGCTTG                 | GGCCAGCTTTCACAAAAGAG                 |
| IGSF1                                                                | CTTGGGAGAACATCACGCTTT                | CCTGCATTGGACTCAGTAAGG                |
| UPK3A                                                                | GCCTCTCTGCATGTTTGACA                 | CCCACCCTCTGTTTGTAGGA                 |
| APOH                                                                 | CCCAAGCCAGATGATTTACCAT               | ACAGTCCTGTGAGAGGGCA                  |
| PLA2G12B                                                             | ATTCCGATGGTGTCTCCACTCG               | CAAGGTCCACACGGTGTGTAAC               |
| ADH6                                                                 | CAATACTGCCAAGGTGACTCC                | GCTCCTGCTGCTTTACAACC                 |
| GAPDH                                                                | CCCATCACCATCTTCCAGGAG                | GTTGTTCATGGATGACCTTGGC               |
| DUSP5                                                                | ACAGCCCTGCTGAATGTCTC                 | GGAGCTAATGTCAGCCGTGT                 |
| <b>Primer sequences for the cloning of EPO 3'UTR enhancer region</b> |                                      |                                      |
| Forward primer 5'-3'                                                 | CGGGGTACCGGGCCCTACGTGCTGTCTCACACA    |                                      |
| Reverse primer 5'-3'                                                 | CCGCTCGAG TTGGCAGCTGCCTTACTGCGGTGA   |                                      |

**Table S2. List of antibodies used in this study**

| Name                 | Supplier                     | Cat no.     |
|----------------------|------------------------------|-------------|
| anti-CAR             | Perseus Proteomics           | PP-N4111-00 |
| anti-STAT3           | BD Transduction Laboratories | S21320      |
| anti-phospho-STAT3   | Cell Signaling Technology    | 9145        |
| anti-AKT             | Cell Signaling Technology    | 4691        |
| anti-phospho-AKT     | Cell Signaling Technology    | 4060        |
| anti-ERK 1/2         | ProteinTech Group            | 16443-1-AP  |
| anti-phospho-ERK 1/2 | Sigma-Aldrich                | M9692       |
| anti-HNF4 $\alpha$   | Santa Cruz Biotechnology     | sc-374229   |
| anti-p21             | Santa Cruz Biotechnology     | sc-397      |
| anti-Ki67            | Cell Signaling Technology    | 9449        |
| anti- $\beta$ -actin | Sigma-Aldrich                | A3854       |

## Supplementary Methods

### Generation of Doxycycline (Dox) inducible hCAR3 stable cell lines

Human CAR3 expression lentivirus plasmid was generated by subcloning the full-length hCAR3 cDNA from the pCMV2-hCAR3 expression plasmid into the EcoRI site of a pCW57-GFP-2A-MCS lentiviral vector as detailed in *Materials and Methods*. For generation of Dox inducible hCAR3 overexpression stable cell lines, HepG2 and Hep3B cells were infected with Dox inducible hCAR3 lentivirus for 72 h, then refed with fresh medium including the selection drug. Cells were refed every 2 days until uninfected control cells were completely killed, which took 4-5 days for puromycin (1  $\mu\text{g}/\text{ml}$ ). The positive infection cells were plated 1 cell/well in 96-well plate. The cells grown up from a single cell were selected and Dox induction was tested again. The cell lines with the best Dox induction for overexpression of hCAR3, named HepG2-hCAR3 and Hep3B-hCAR3, were selected for use in this study.

### Cell-Titer-Glo Assay

Cell viability was assayed using Cell-Titer-Glo Assay kit (Promega, Madison, WI) according to the manufacturer's instructions. The HepG2, HepG2-hCAR, HepG2-hCAR3, Hep3B, Hep3B-hCAR, and Hep3B-hCAR3 cells were seeded at the density of  $0.5 \times 10^3$  or  $1 \times 10^3$  per well in 96-well plates. The cells were treated with vehicle control or Dox (1  $\mu\text{g}/\text{ml}$ ). At the time points of days 0, 2, 4, 6, and 8, the luminescence was read on a 96 microplate luminometer (Promega, Madison, WI). Relative cell growth rate was normalized against control on day 0. Data were collected from at least three independent experiments and expressed as mean  $\pm$  S.D. \*\*,  $p < 0.01$ .

# Unedited Gel for Western blotting

## Figure 2D

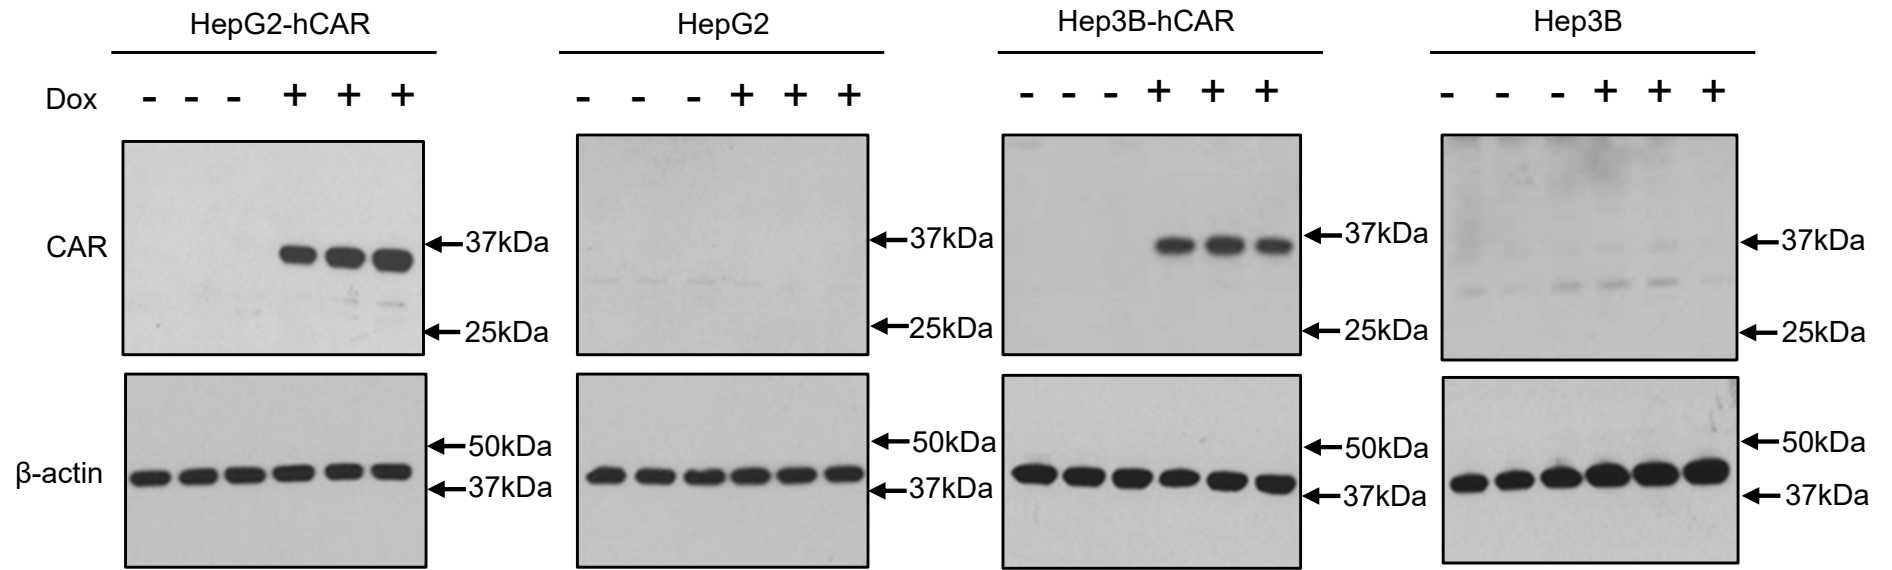

## Figure 2G

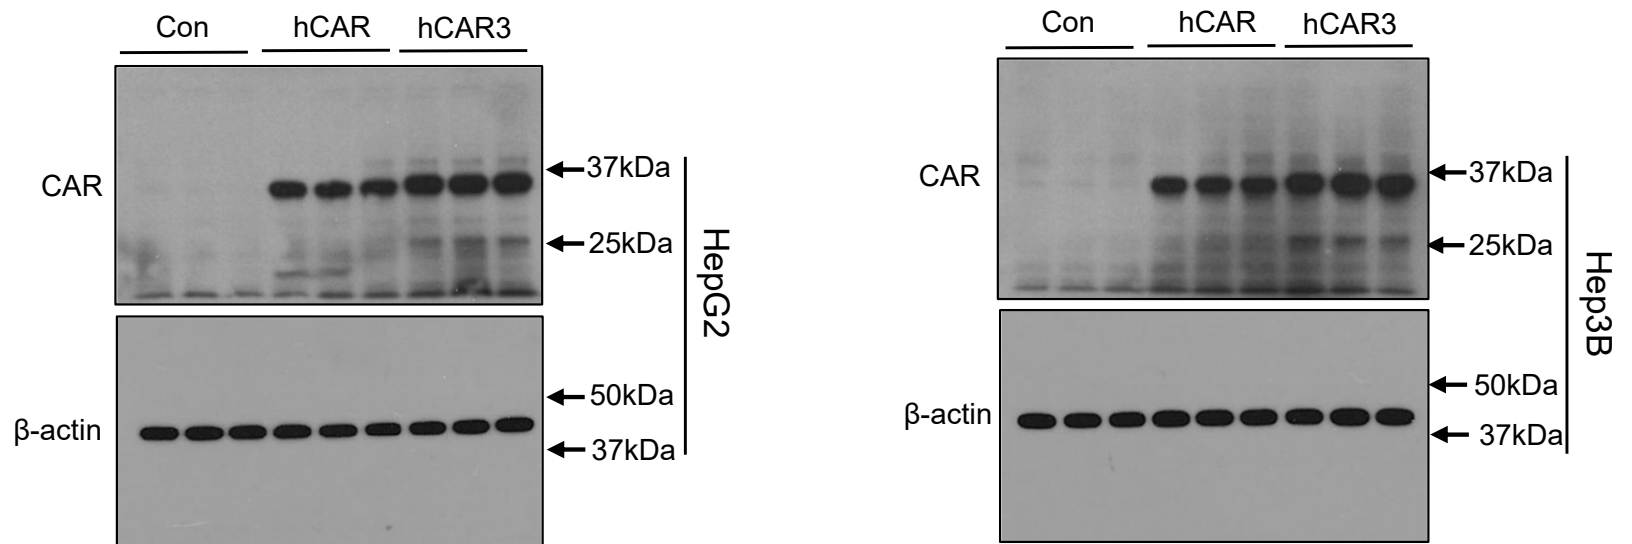

Figure 3D

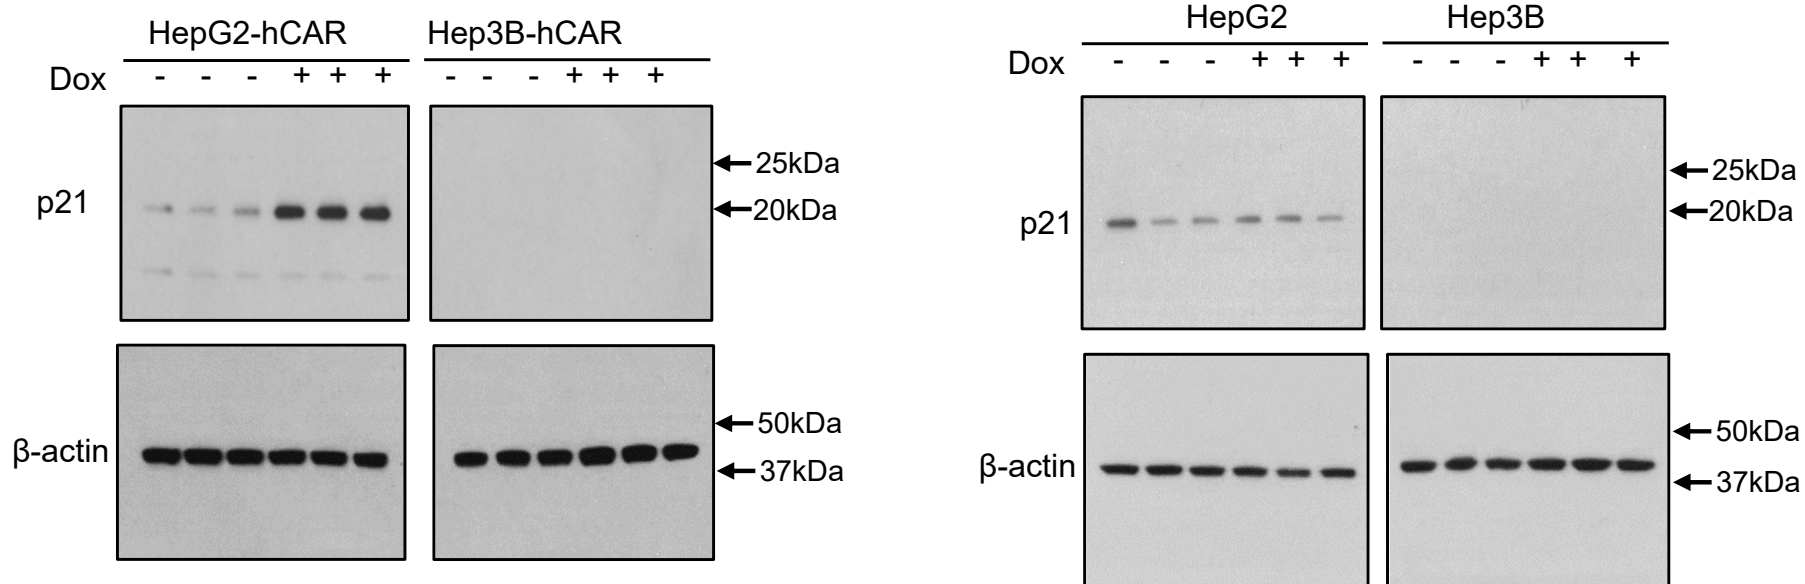

Figure 4D

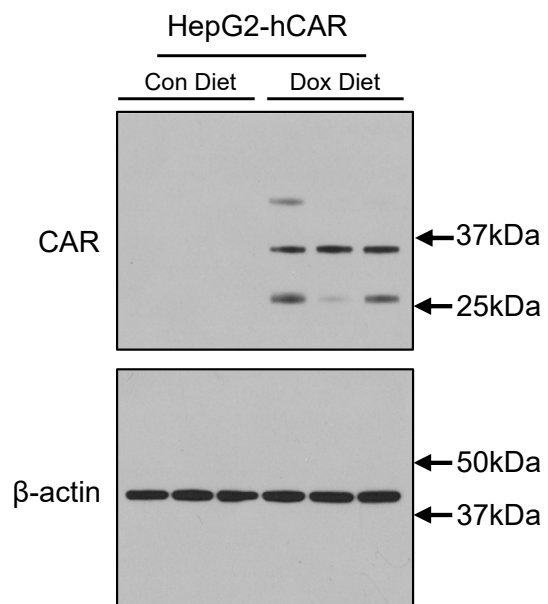

Figure 4G

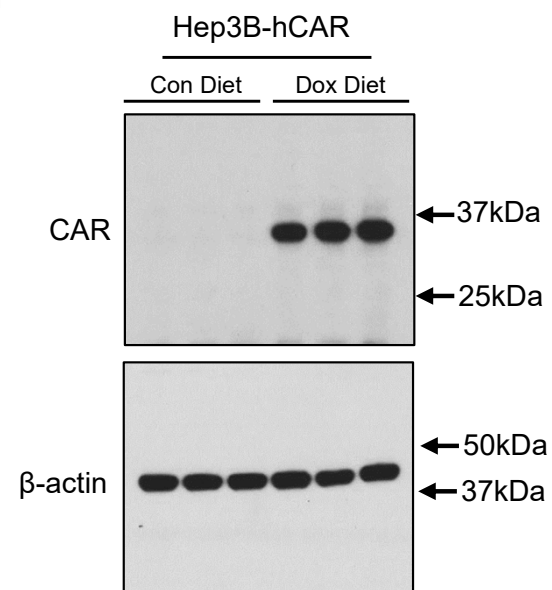

Figure 7B

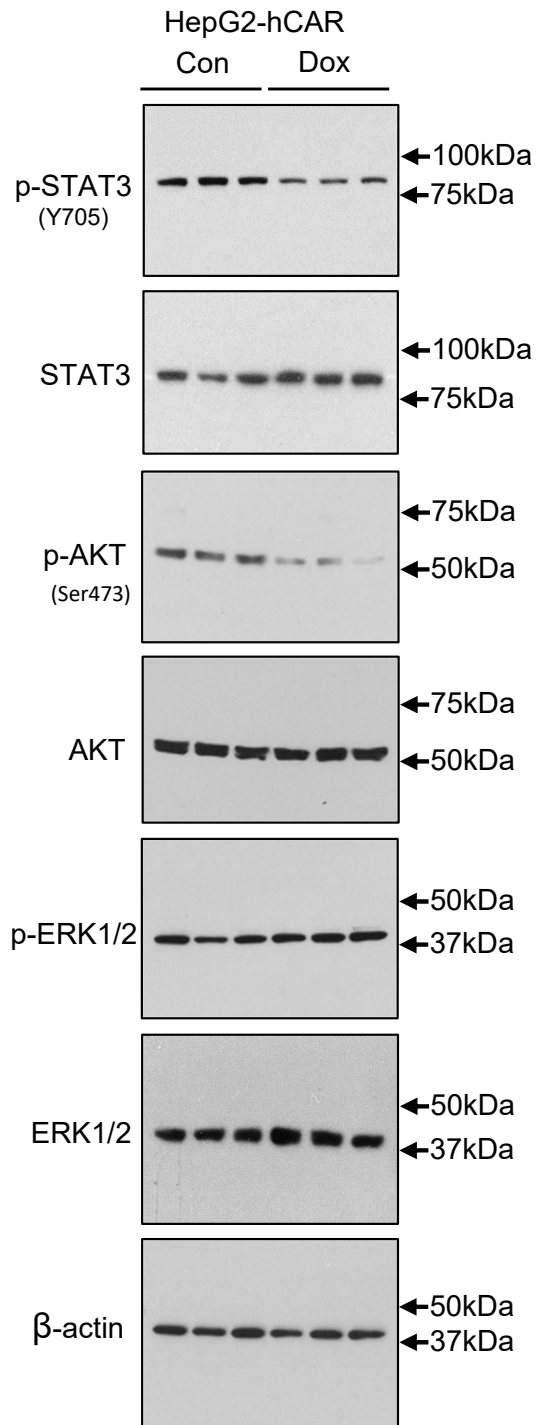

Figure 7C

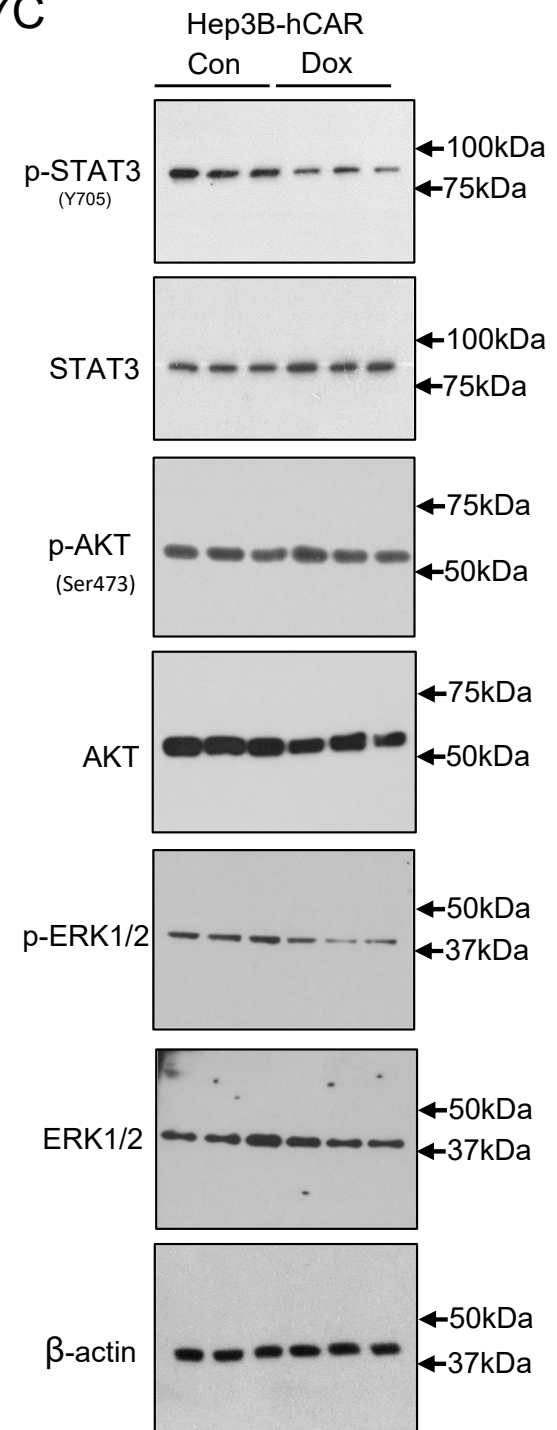

Figure 8B

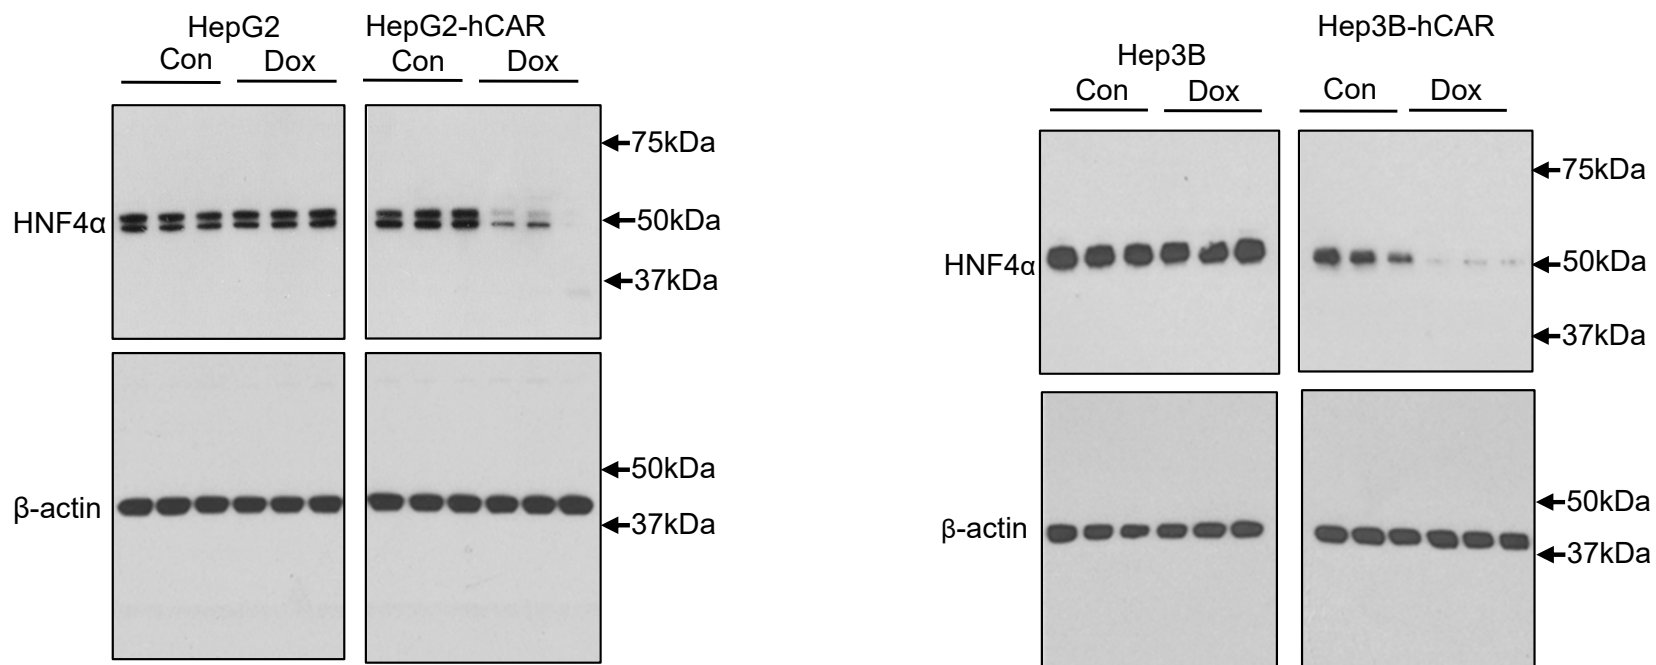



Figure S2

A

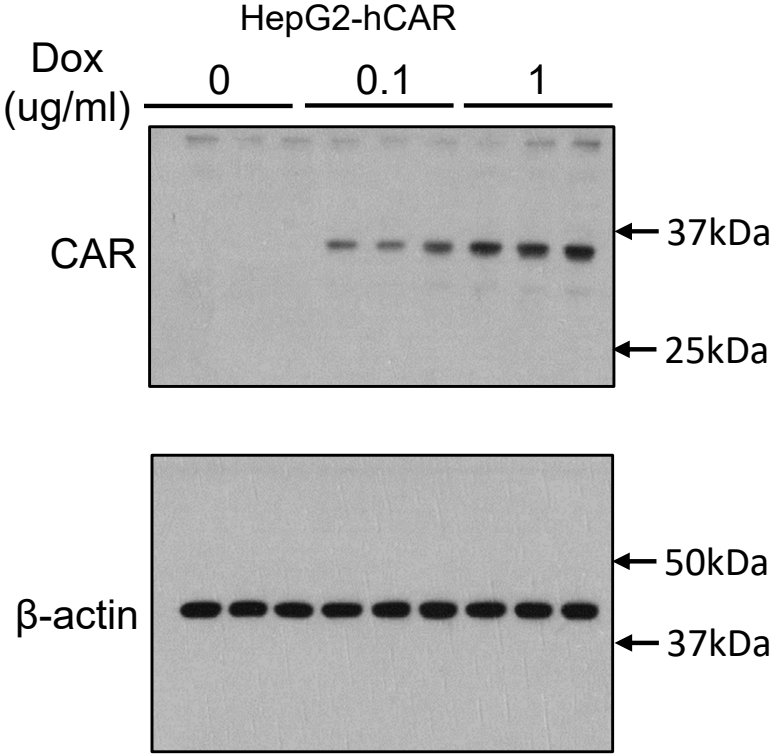

B

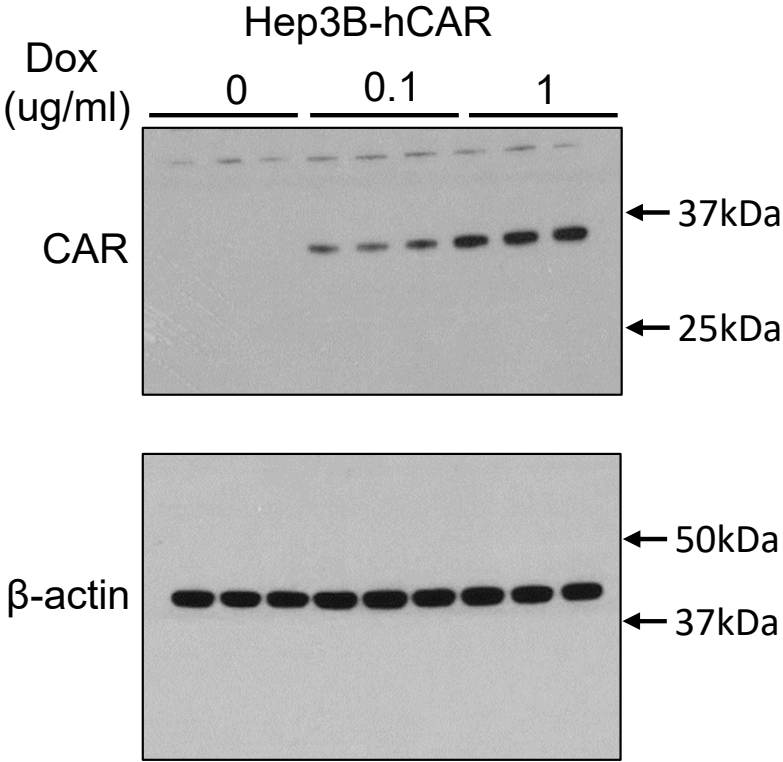

Supplement: mmc1.pdf [file mmc1.pdf]
